# Supplementary material
Source: Frontiers journal article supplement (https://www.frontiersin.org/articles/312670)

## Supplemental Document

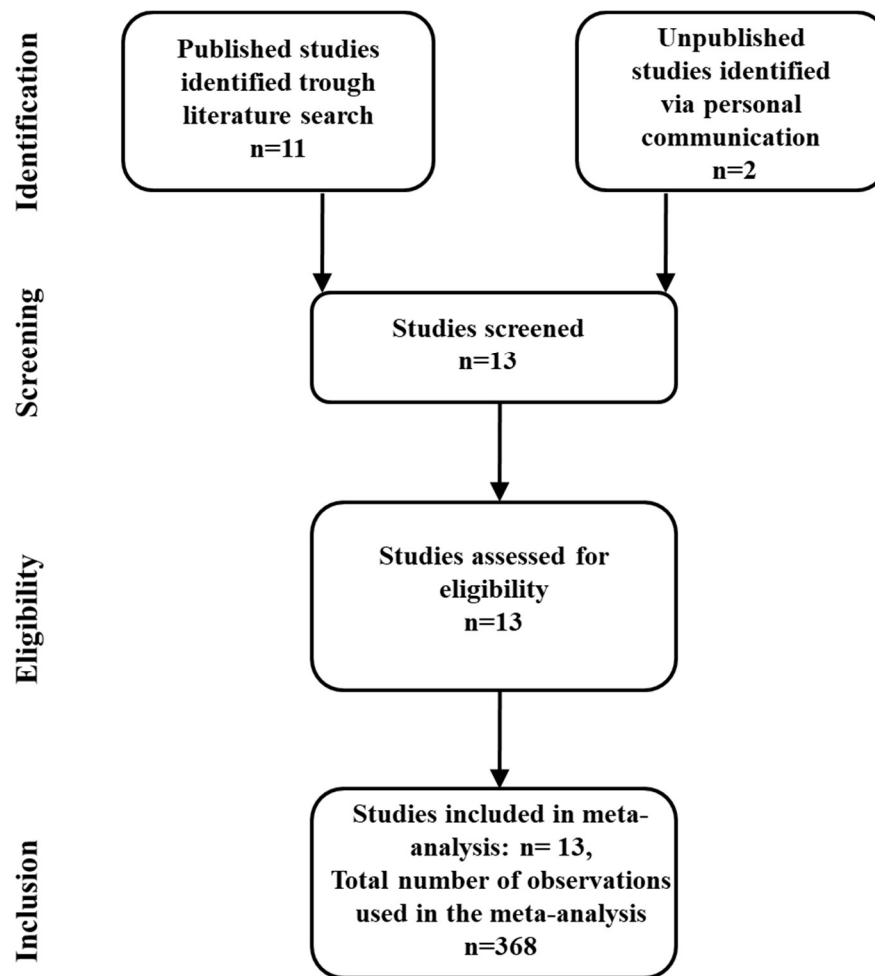

Supplemental Figure 1: Modified PRISMA (Preferred Reporting Items for Systematic Reviews and Meta-Analysis) flow diagram indicating the number of studies identified during each step of our literature search and meta-analysis. Apart from all 368 observations, two subgroups were analyzed. Studies with short incubation time 0-12 hours (n=3) and long incubation times of 24 hours (n=13).

Supplemental Figure 2. Publication bias as indicated by the contour-enhanced funnel plot checking for funnel plot asymmetry using a standard meta-analytic model with standard error as the predictor. Note that the funnel is centered at zero.

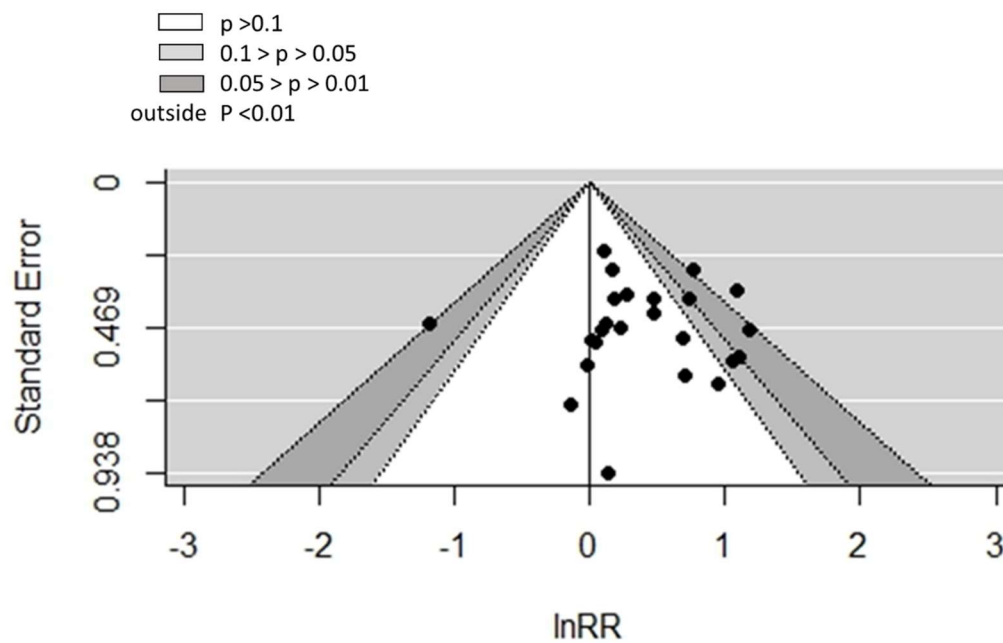

Supplemental Figure 3. Forest plot of lnRR and mean effect size (i.e. RE Model) of enriched water versus bubble method for (A) short incubation times (0- 12 hours) and (B) long incubation times of 24 hours. Left panel indicates authors and incubation time. Middle panel denotes each study represented by a filled square and horizontal line (symbol size represents corresponding weighted lnRR and 95% confidence interval). Right panel indicates symbols as depicted in the middle panel in numbers. Studies with confidence intervals that intersect the vertical line of unity (lnRR=0) indicate no difference between the enriched water and bubble method. Heterogeneity of the meta-analysis is indicated by  $Q_M$  (df 7) = 10.06,  $p= 0.185$  for (A) and for  $Q_M$  (df 11) = 10.98,  $p= 0.446$  for (B).

(A)

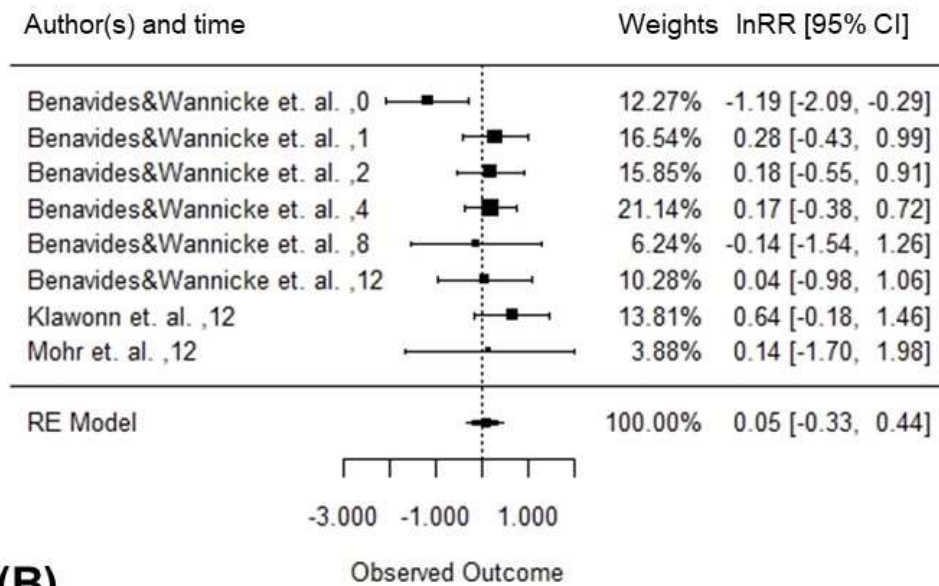

(B)

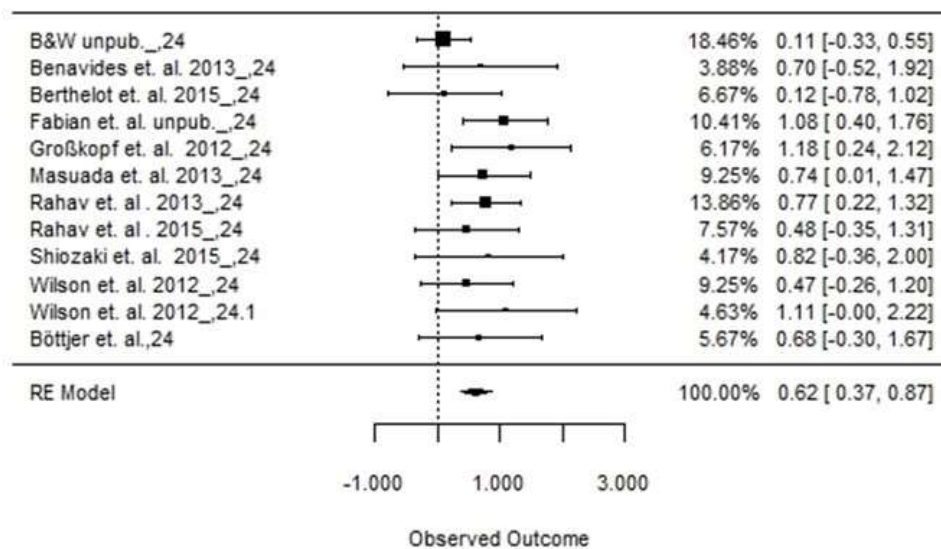

Supplement: Presentation_1.pdf [file Presentation_1.pdf]
